# Supplementary material for: miR-18a Contributes to Preeclampsia by Downregulating Smad2 (Full Length) and Reducing TGF-β Signaling
Source: PubMed Central journal article supplement — Mol Ther Nucleic Acids. 2020 Sep 23;22:542–56. doi: 10.1016/j.omtn.2020.09.019 (PMC7566009; doi:10.1016/j.omtn.2020.09.019), 2020-09-23
Supplement: mmc1.pdf [file mmc1.pdf]

**OMTN, Volume 22**

**Supplemental Information**

**miR-18a Contributes to Preeclampsia  
by Downregulating Smad2 (Full Length)  
and Reducing TGF- $\beta$  Signaling**

**Peng Xu, Zhilang Li, Yongqing Wang, Xin Yu, Xuan Shao, Yu-xia Li, Chun Peng, Yangyu Zhao, and Yan-Ling Wang**

```

10      20      30      40      50      60      70      80      90
Smad2(437aa): MSSILPFTPPVVKRLLGWKKAGGSGGGGQNGQEEKWEKAVKSLVKKLKKTGHLDELEKATTQNCNTKCVTIPPSLDGRQVSHR :90
Smad2(425aa): MLQLQFSSII I VFLEAG I F LFFSNLAAP NVSSDSSTCSEIWGLSTPNTIDQWDTTGLYSFSEQT-----FSLDGRQVSHR :78
Smad2(418aa): MCYHTKIFSVDLLLSLLILFLCCIQSVKPT-----TCSEIWGLSTPNTIDQWDTTGLYSFSEQT-----FSLDGRQVSHR :71
Smad2(414aa): MCYHTK-----G I F LFFSNLAAP NVSSDSSTCSEIWGLSTPNTIDQWDTTGLYSFSEQT-----FSLDGRQVSHR :67

100     110     120     130     140     150     160     170     180
Smad2(437aa): KGLPHVIYICRLWRWPDLHSHHELKAI ENCEYAFNLKKDEVCVNPHYHYQRVETPVLPPVLPVRHTEI LTELPLDDYTHS I PENTNFPAGI :180
Smad2(425aa): KGLPHVIYICRLWRWPDLHSHHELKAI ENCEYAFNLKKDEVCVNPHYHYQRVETPVLPPVLPVRHTEI LTELPLDDYTHS I PENTNFPAGI :168
Smad2(418aa): KGLPHVIYICRLWRWPDLHSHHELKAI ENCEYAFNLKKDEVCVNPHYHYQRVETPVLPPVLPVRHTEI LTELPLDDYTHS I PENTNFPAGI :161
Smad2(414aa): KGLPHVIYICRLWRWPDLHSHHELKAI ENCEYAFNLKKDEVCVNPHYHYQRVETPVLPPVLPVRHTEI LTELPLDDYTHS I PENTNFPAGI :157

190     200     210     220     230     240     250     260     270
Smad2(437aa): EPQSNYIPETPPPGYI SEDGETSDQQLNQSMDTGSPAELSPPTLSPVNHSLDLQPVTYSEPAFWCSI AYYELNQRVGETFHASQPSLTVD :270
Smad2(425aa): EPQSNYIPETPPPGYI SEDGETSDQQLNQSMDTGSPAELSPPTLSPVNHSLDLQPVTYSEPAFWCSI AYYELNQRVGETFHASQPSLTVD :258
Smad2(418aa): EPQSNYIPETPPPGYI SEDGETSDQQLNQSMDTGSPAELSPPTLSPVNHSLDLQPVTYSEPAFWCSI AYYELNQRVGETFHASQPSLTVD :251
Smad2(414aa): EPQSNYIPETPPPGYI SEDGETSDQQLNQSMDTGSPAELSPPTLSPVNHSLDLQPVTYSEPAFWCSI AYYELNQRVGETFHASQPSLTVD :247

280     290     300     310     320     330     340     350     360
Smad2(437aa): GFTDPSNSERFCLGLLSNVNRNATVEMTRRHI GRGVRLYYI GGEVFAECLSDSAI FVQSPNCNQRYGWHHPATVCKI PPGCNLKIFNNQEF :360
Smad2(425aa): GFTDPSNSERFCLGLLSNVNRNATVEMTRRHI GRGVRLYYI GGEVFAECLSDSAI FVQSPNCNQRYGWHHPATVCKI PPGCNLKIFNNQEF :348
Smad2(418aa): GFTDPSNSERFCLGLLSNVNRNATVEMTRRHI GRGVRLYYI GGEVFAECLSDSAI FVQSPNCNQRYGWHHPATVCKI PPGCNLKIFNNQEF :341
Smad2(414aa): GFTDPSNSERFCLGLLSNVNRNATVEMTRRHI GRGVRLYYI GGEVFAECLSDSAI FVQSPNCNQRYGWHHPATVCKI PPGCNLKIFNNQEF :337

370     380     390     400     410     420     430
Smad2(437aa): AALLAQSVNQGF EAVYQLTRMCTIFNSFVKGWGAEYR RQTVTSTPCWI ELHLNGPLQWLDKVLTMGSPSVRCSSMS :437
Smad2(425aa): AALLAQSVNQGF EAVYQLTRMCTIFNSFVKGWGAEYR RQTVTSTPCWI ELHLNGPLQWLDKVLTMGSPSVRCSSMS :425
Smad2(418aa): AALLAQSVNQGF EAVYQLTRMCTIFNSFVKGWGAEYR RQTVTSTPCWI ELHLNGPLQWLDKVLTMGSPSVRCSSMS :418
Smad2(414aa): AALLAQSVNQGF EAVYQLTRMCTIFNSFVKGWGAEYR RQTVTSTPCWI ELHLNGPLQWLDKVLTMGSPSVRCSSMS :414

```

**Figure S1. Five conserved peptides and one Smad2( $\Delta$ exon3)-specific peptide were detected in mass spectrum analysis.**

Red sequences indicated the Smad2( $\Delta$ exon3)-specific peptide. Blue sequences indicated the conserved peptides of different Smad2 variants.

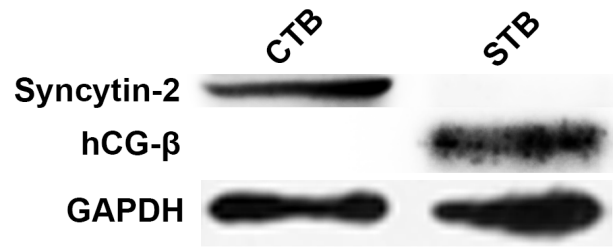

**Figure S2. Validation of the identity of primary CTBs and STBs.**

The expression levels of cell type markers, syncytin-2 and hCG- $\beta$  respectively, were detected by Western blotting analysis.

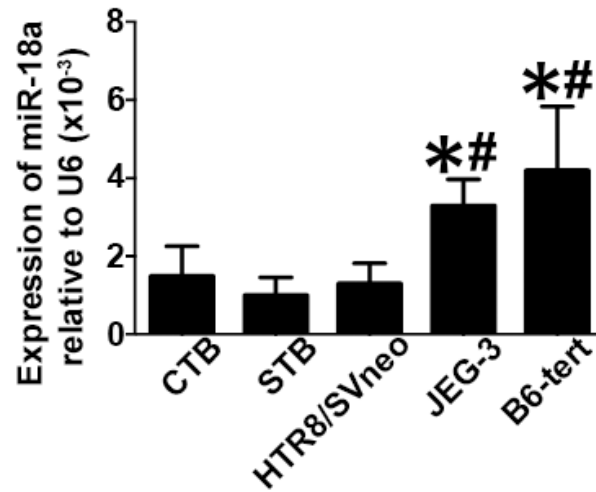

**Figure S3. miR-18a expression levels in different cells.**

Examination of miR-18a expression levels in primary CTBs, primary STBs, HTR8/SVneo, JEG-3 and B6-tert cells. Data are presented as mean $\pm$ SD. \* $p$ <0.05 vs. the miR-18a level of primary CTB. # $p$ <0.05 vs. the miR-18a level of primary STB.

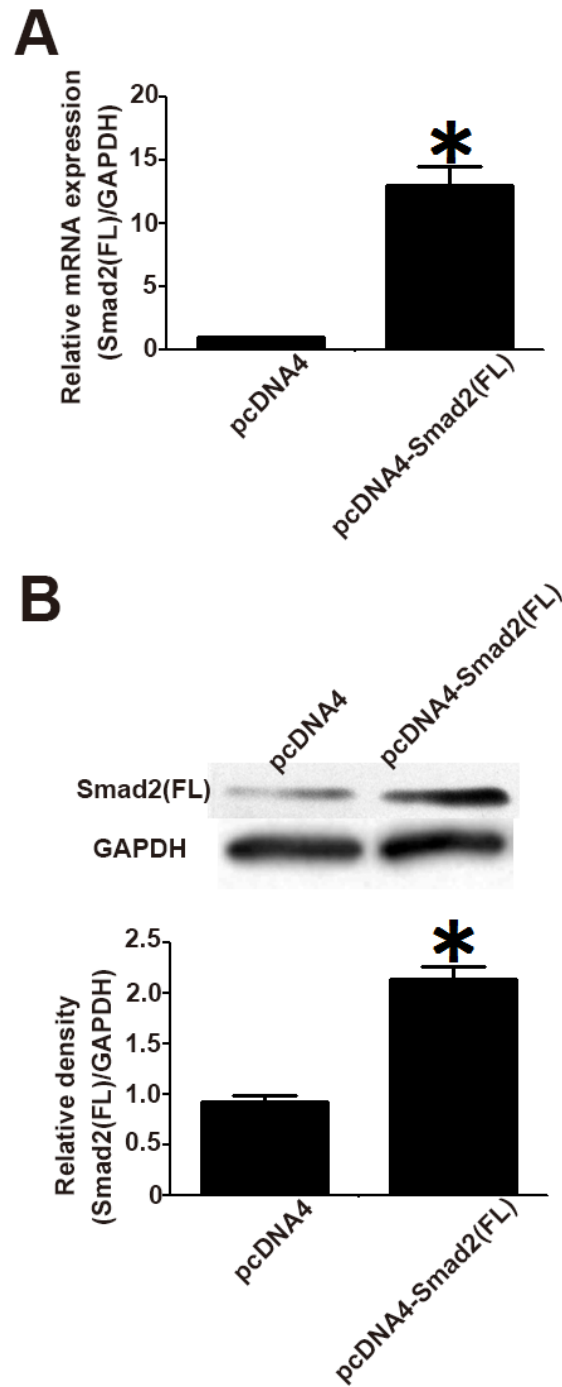

**Figure S4. Validation of the accuracy of pcDNA4-Smad2(FL) plasmid.**

The expression of Smad2(FL) in HTR8/SVneo cells transfected with pcDNA4-Smad2(FL) or pcDNA4 plasmid were measured by real-time PCR (A) and western blotting experiments (B). \* $p < 0.05$ .
